# Supplementary material for: Characterization and spontaneous induction of urinary tract Streptococcus anginosus prophages
Source: PubMed Central journal article supplement (PMC7414447; doi:10.1099/jgv.0.001407), 2020-04-21
Supplement: jgv-101-685-s003.pdf [file jgv-101-685-s003.pdf]

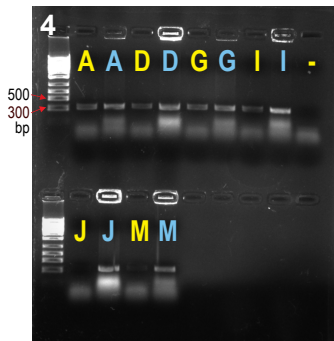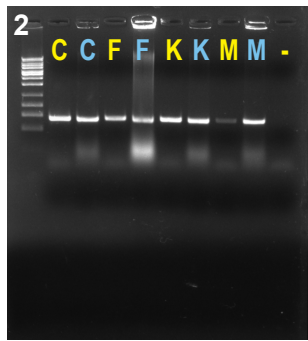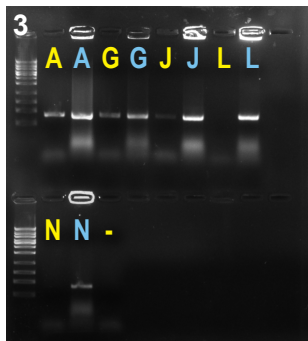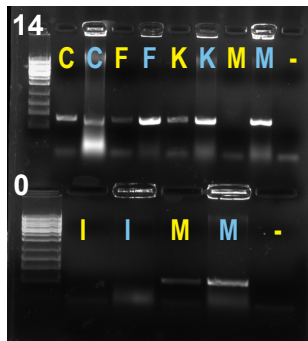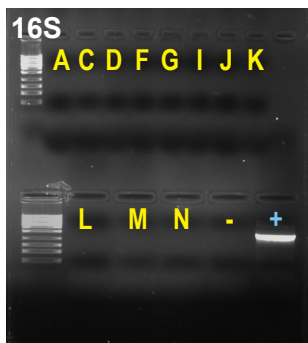

### Strains

|            |            |
|------------|------------|
| A: UMB0248 | H: UMB3444 |
| B: UMB0567 | I: UMB4683 |
| C: UMB0595 | J: UMB4708 |
| D: UMB0619 | K: UMB7052 |
| E: UMB0622 | L: UMB8390 |
| F: UMB0633 | M: UMB8616 |
| G: UMB2128 | N: UMB8710 |

**Supplemental Figure 1.** Agarose gels for Trial 2 PCR-based detection of predicted prophage sequences in viral lysate (yellow) and bacterial colony controls (light blue). Negative controls (no DNA) are indicated by “-”.

**Supplemental Table 3.** Primers for detecting lytic phages.

| <b>Phage Group #</b> | <b>Primer Pair</b>                          | <b>Expected Amplicon Size (bp)</b> |
|----------------------|---------------------------------------------|------------------------------------|
| 2                    | CTGCAACCTCATCATTGC &<br>CCGGCGCTGTCTTATATC  | 475                                |
| 4                    | ATTCGCGCTAAGAAGTGC<br>& TGCTCAGAATGTGCTTGG  | 349                                |
| 3                    | ATTGCGCAAGGACAGC &<br>CGAATTGGTGCGACTATG    | 460                                |
| 14                   | TCGCTCAATCATCTCATCC<br>& GATATGCCGGTCTTGGAG | 447                                |
| 0                    | TGAGCTTGCGTAGGTCAG &<br>AGCGCAGACTCAGAGAGG  | 307                                |
